# Supplementary material
Source: PubMed Central journal article supplement (PMC1895935)
Supplement: pnas_0701408104_1.pdf [file pnas_0701408104_1.pdf]

**Table 3. Cortical regions exhibiting differential activity for whole-brain random-effects group analyses ( $P < 0.001$ , uncorrected;  $k > 10$ )**

| <b>Regions</b>                                   | <b>MNI coordinates</b> |          |          | <b>t</b> | <b>Z</b> |
|--------------------------------------------------|------------------------|----------|----------|----------|----------|
|                                                  | <b>x</b>               | <b>y</b> | <b>z</b> |          |          |
| <b>(1) Negative Belief &gt; Neutral Belief</b>   |                        |          |          |          |          |
| R Anterior STS                                   | 54                     | -36      | 6        | 9.7      | 4.57     |
| DMPFC                                            | 6                      | 44       | 36       | 6.9      | 3.98     |
| <b>(2) Negative Outcome &gt; Neutral Outcome</b> |                        |          |          |          |          |
| <b><u>Negative Outcome:</u></b>                  |                        |          |          |          |          |
| <b>(3) Neutral Belief &gt; Negative Belief</b>   |                        |          |          |          |          |
| precuneus                                        | -10                    | -56      | 42       | 12       | 5        |
| R Middle Frontal Gyrus                           | 22                     | 28       | 48       | 11       | 4.75     |
| R Inferior Parietal Cortex                       | 56                     | -42      | 42       | 9        | 4.46     |
| L Middle Frontal Gyrus                           | -26                    | 28       | 36       | 9.9      | 4.6      |
| R Anterior Cingulate Sulcus                      | 14                     | 40       | 20       | 6.5      | 3.86     |
| L Anterior Cingulate Sulcus                      | -8                     | 18       | 36       | 6.1      | 3.74     |
| <b>(4) Negative Belief &gt; Neutral Belief</b>   |                        |          |          |          |          |
| R Anterior Superior Temporal Gyrus               | 60                     | -4       | 4        | 6.1      | 3.74     |
| <b><u>Neutral Outcome:</u></b>                   |                        |          |          |          |          |
| <b>(5) Neutral Belief &gt; Negative Belief</b>   |                        |          |          |          |          |
|                                                  | -                      | -        | -        | -        | -        |
| <b>(6) Negative Belief &gt; Neutral Belief</b>   |                        |          |          |          |          |
|                                                  | -                      | -        | -        | -        | -        |
