# Supplementary material
Source: PubMed Central journal article supplement (PMC1895935)
Supplement: pnas_0701408104_2.pdf [file pnas_0701408104_2.pdf]

**Table 4. Belief attribution ROIs, Exp. 2: mean PSC in five ROIs during the “belief” segment of the moral scenarios**

| ROI   | Mean PSC (belief, outcome) |           |           |          | Interaction of belief x outcome |       |         |                        |
|-------|----------------------------|-----------|-----------|----------|---------------------------------|-------|---------|------------------------|
|       | Neut, Neut                 | Neut, Neg | Neg, Neut | Neg, Neg | DF                              | F     | P value | Partial h <sup>2</sup> |
| RTPJ  | 0.41                       | 0.61      | 0.76      | 0.53     | (1,14)                          | 11.15 | 0.007   | 0.42                   |
| PC    | 0.12                       | 0.22      | 0.29      | 0.14     | (1,16)                          | 4.87  | 0.04    | 0.23                   |
| LTPJ  | 0.32                       | 0.49      | 0.61      | 0.45     | (1,15)                          | 4.08  | 0.06    | 0.21                   |
| dMPFC | -0.03                      | 0.22      | 0.28      | 0.14     | (1,13)                          | 3.88  | 0.07    | 0.23                   |
| mMPFC | -0.2                       | -0.08     | -0.03     | -0.2     | (1,11)                          | 2.3   | 0.16    | 0.17                   |
| vMPFC | -0.14                      | -0.11     | -0.02     | -0.15    | (1,9)                           | 0.86  | 0.38    | 0.09                   |

Two of these regions showed a significant interaction between negative (Neg) and neutral (Neut) belief and outcome information.
